# Supplementary material
Source: Springer Nature journal article supplement (https://www.springermedizin.de/resource/supplementary/12873_2005_27_MOESM6_ESM.pdf/9431830)

# Thomas ST

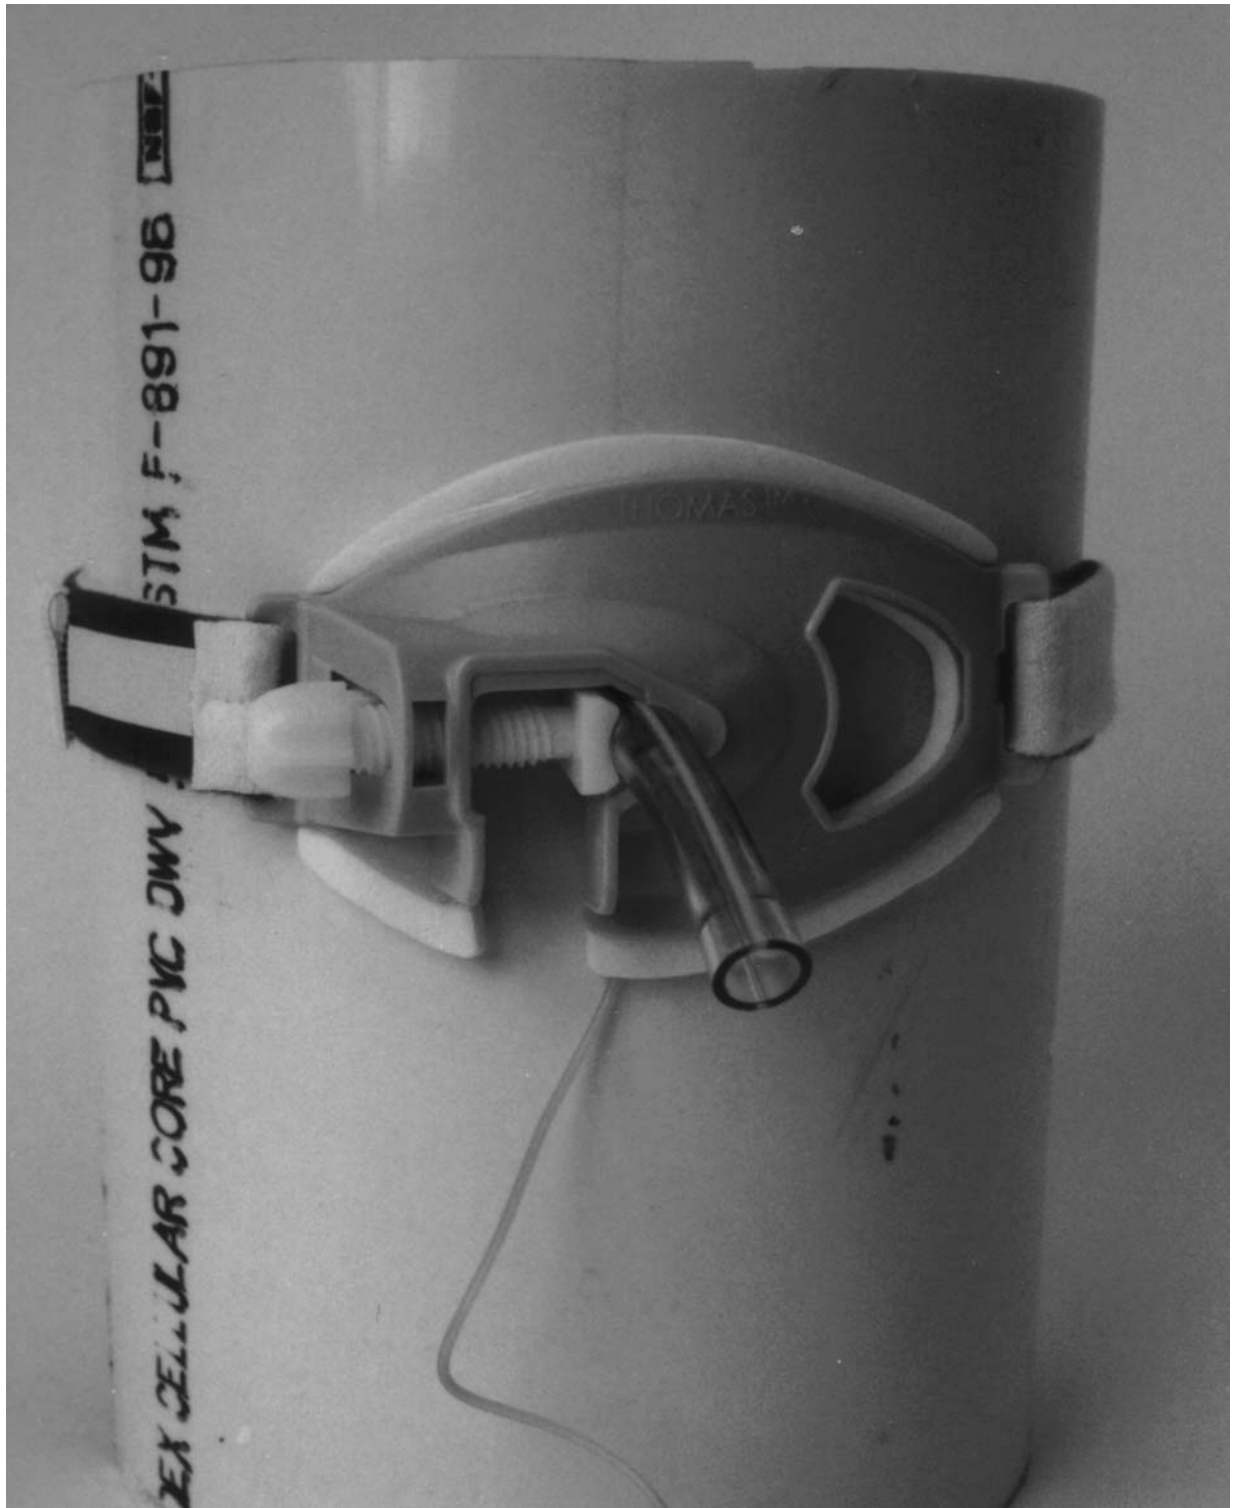

Supplement: MOESM6 [file 9431830]
